# Erratum: the SAMI Galaxy Survey: can we trust aperture corrections to predict star formation?

by S. N. Richards,<sup>1,2,3★</sup> J. J. Bryant,<sup>1,2,3</sup> S. M. Croom,<sup>1,3</sup> A. M. Hopkins,<sup>2</sup>  
A. L. Schaefer,<sup>1,2,3</sup> J. Bland-Hawthorn,<sup>1</sup> J. T. Allen,<sup>1,3</sup> S. Brough,<sup>2</sup> G. Cecil,<sup>1,4</sup>  
L. Cortese,<sup>5</sup> L. M. R. Fogarty,<sup>1,3</sup> M. L. P. Gunawardhana,<sup>6</sup> M. Goodwin,<sup>2</sup>  
A. W. Green,<sup>2</sup> I.-T. Ho,<sup>7,8</sup> L. J. Kewley,<sup>8</sup> I. S. Konstantopoulos,<sup>9,2</sup> J. S. Lawrence,<sup>2</sup>  
N. P. F. Lorente,<sup>2</sup> A. M. Medling,<sup>8</sup> M. S. Owers,<sup>2,10</sup> R. Sharp,<sup>8,3</sup> S. M. Sweet<sup>8</sup>  
and E. N. Taylor<sup>11</sup>

<sup>1</sup>Sydney Institute for Astronomy, School of Physics, University of Sydney, NSW 2006, Australia

<sup>2</sup>Australian Astronomical Observatory, PO Box 915, North Ryde, NSW 1670, Australia

<sup>3</sup>CAASTRO: ARC Centre of Excellence for All-sky Astrophysics

<sup>4</sup>Department of Physics and Astronomy, University of North Carolina, Chapel Hill, NC 27510, USA

<sup>5</sup>International Centre for Radio Astronomy Research, University of Western Australia, 35 Stirling Hwy, Crawley, WA 6009, Australia

<sup>6</sup>Institute for Computational Cosmology and Centre for Extragalactic Astronomy, Department of Physics, Durham University, South Road, Durham DH1 3LE, UK

<sup>7</sup>Institute for Astronomy, University of Hawaii, 2680 Woodlawn Drive, Honolulu, HI 96822, USA

<sup>8</sup>Research School of Astronomy and Astrophysics, Australian National University, Cotter Rd, Weston, ACT 2611, Australia

<sup>9</sup>Envizi, Level 2, National Innovation Centre, Australian Technology Park, 4 Cornwallis Street, Eveleigh NSW 2015, Australia

<sup>10</sup>Department of Physics and Astronomy, Macquarie University, NSW 2109, Australia

<sup>11</sup>School of Physics, The University of Melbourne, Parkville, VIC 3010, Australia

**Key words:** errata, addenda – techniques: spectroscopic – galaxies: evolution.

The paper ‘The SAMI Galaxy Survey: can we trust aperture corrections to predict star formation?’ was published in MNRAS 455, 2826 (2016). A mischaracterization of the data presented in Figs 10 & 11 of the original paper affects our conclusion on the biases found in the Brinchmann et al. (2004, hereafter B04) aperture correction. Conclusions regarding the Hopkins et al. (2003, hereafter H03) aperture correction remain unaffected.

In Section 3.3, we state, ‘When the nuclear spectra underestimate the Balmer decrement for the disc, the SFR (star formation rate) derived from an aperture correction cube built from only nuclear spectra is overestimated. Inversely, when the nuclear spectra overestimate the Balmer decrement for the disc, the SFR is underestimated.’ This is incorrect, and should read, ‘When the nuclear spectra underestimate the Balmer decrement for the disc, the SFR derived from an aperture correction cube built from only the nuclear spectra is underestimated. Conversely, when the nuclear spectra overestimate the Balmer decrement for the disc, the SFR is overestimated.’

In the caption for Fig. 10, we state, ‘For positive difference, the nuclear ACC (aperture correction cube) underpredicts the SFR found from the disc ACC, and vice versa’. This should read that for positive difference, the nuclear ACC overpredicts the SFR found from the disc ACC, and vice versa.

In the caption for Fig. 11, we state, ‘Galaxies with a higher SFR (or higher stellar mass) tend to have more dust in their disc compared to their nucleus.’ What the data actually show is that galaxies with higher SFR (or higher stellar mass) tend to have more dust in their

nucleus compared to their disc. This agrees with the results of Iglesias-Páramo et al. (2013), to which we correctly compare in Section 4.2 of the original paper.

In Sections 4.2 and 5(v), we conclude that the previously thought under/overestimation of B04 for high/low star-forming galaxies can explain the slope found in Fig. 3(c) of the original paper. This conclusion should state that for high star-forming galaxies, their decreasing dust gradient implies that the B04 aperture correction would overpredict the instantaneous SFR. For low star-forming galaxies, B04 would underpredict the instantaneous SFR. If corrected for, the gradient of the slope found in Fig. 3(c) would deviate furthermore from a 1:1 relationship. The magnitude of this correction remains unknown due to the mismatch of spectral filters used, but these data still highlight the existence of a bias due to the dust degeneracy of the B04 aperture correction.

## ACKNOWLEDGEMENTS

We are grateful for comments made by Samir Salim that led to the discovery of the errors.

## REFERENCES

- Brinchmann J., Charlot S., White S. D. M., Tremonti C., Kauffmann G., Heckman T., Brinkmann J., 2004, MNRAS, 351, 1151 (B04)
- Hopkins A. M. et al., 2003, ApJ, 599, 971 (H03)
- Iglesias-Páramo J. et al., 2013, A&A, 553, L7

\* E-mail: samuel@physics.usyd.edu.au

This paper has been typeset from a  $\text{\LaTeX}$  file prepared by the author.
